# Supplementary material
Source: Springer Nature journal article supplement (https://www.springermedizin.de/resource/supplementary/12876_2007_317_MOESM6_ESM.pdf/9439152)

**DDD/1000/day**

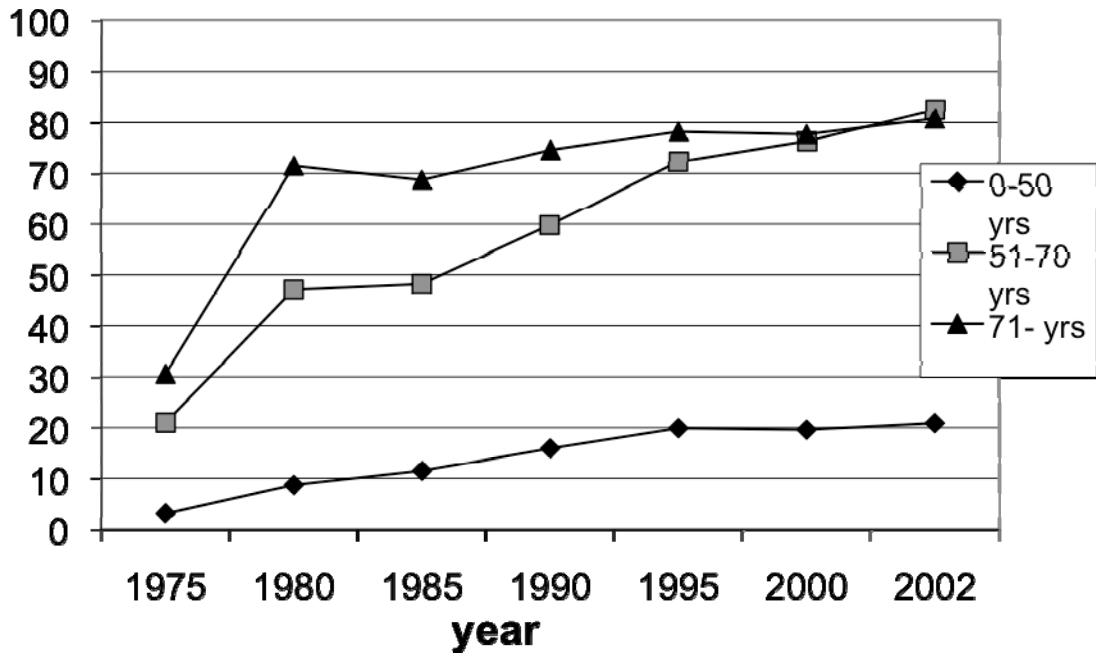

Supplement: MOESM6 [file 9439152]
